# Supplementary material for: COVID-19 vaccine hesitancy in Africa: A scoping review
Source: Research Square preprint supplement (doi:10.21203/rs.3.rs-759005/v1), 2021-08-16
Supplement: Supplementary file 1 [file 795e48fe65297b36a7467e23.docx]

**Additional file**

**COVID-19 vaccine hesitancy in Africa: A scoping review**

Betty B.B. Ackah1, Michael Woo2, Ugochinyere Vivian Ukah3, Zahra A Fazal2, Lisa Stallwood2, Arnold Okpani4, Prince A. Adu2

1School of Communication, SimonFraser University, Burnaby, Canada, BC Canada

2University of British Columbia, Vancouver, BC Canada

3Department of Epidemiology, Biostatistics and Occupational Health, McGill University, Montreal, QC Canada

4National Primary Health Care Development Agency, Abuja, Nigeria

**Detailed search strategy and results**

Database: Google Scholar

Search details: May 31 5:00PM PST - Collected relevant results from each search results on the first 10 pages

| **Search term** | **Number of notable mentions (92 total)** |
| --- | --- |
| 1. “Africa” AND “COVID-19” AND “vaccine hesitancy” | **17** |
| 1. “Ghana” AND “COVID-19” AND “vaccine hesitancy” | **16** |
| 1. “Burkina” AND “COVID-19” AND “vaccine hesitancy” | **2** |
| 1. “Cameroon” AND “COVID-19” AND “vaccine hesitancy” | **8** |
| 1. “Congo” AND “COVID-19” AND “vaccine hesitancy” | **11** |
| 1. “Cote d'Ivoire” AND “COVID-19” AND “vaccine hesitancy” | **6** |
| 1. “Ethiopia” AND “COVID-19” AND “vaccine hesitancy” | **14** |
| 1. “Gabon” AND “COVID-19” AND “vaccine hesitancy” | **1** |
| 1. “Madagascar” AND “COVID-19” AND “vaccine hesitancy” | **0** |
| 1. “Mauritania” AND “COVID-19” AND “vaccine hesitancy” | **3** |
| 1. “Mauritius” AND “COVID-19” AND “vaccine hesitancy” | **2** |
| 1. “Sierra Leone” AND “COVID-19” AND “vaccine hesitancy” | **3** |
| 1. “Somalia” AND “COVID-19” AND “vaccine hesitancy” | **2** |
| 1. “South Africa” AND “COVID-19” AND “vaccine hesitancy” | **5** |
| 1. “Zambia” AND “COVID-19” AND “vaccine hesitancy” | **2** |
| **Total** | 92 total downloads to Covidence for screening |

Database: OVID Medline

Search date: May 31, 6:30 PM PST

| **#** | **Query** |  |
| --- | --- | --- |
| 1 | africa/ or exp "africa south of the sahara"/ | 247307 |
| 2 | (((Africa or Sub-saharan Africa or Angola or Benin or Botswana or Burkina Faso or Burundi or Cabo Verde or Cameroon or Central African Republic or Chad or Comoros or Congo or Cote d'Ivoire or Djibouti or Equatorial Guinea or Eritrea or Eswatini or Ethiopia or Gabon or Gambia or Ghana or Guinea or Guinea-Bissau or Kenya or Lesotho or Liberia or Madagascar or Malawi or Mali or Mauritania or Mauritius or Mozambique or Namibia or Niger or Nigeria or Rwanda or Sao Tome) and Principe) or Senegal or Seychelles or Sierra Leone or Somalia or South Africa or South Sudan or Sudan or Tanzania or Togo or Uganda or Zambia or Zimbabwe).mp. [mp=title, abstract, original title, name of substance word, subject heading word, floating sub-heading word, keyword heading word, organism supplementary concept word, protocol supplementary concept word, rare disease supplementary concept word, unique identifier, synonyms] | 125685 |
| 3 | 1 or 2 | 275125 |
| 4 | ((vaccin* adj8 (hesita* or accept* or perception* or attitude or sentiment or distrust or trust or perspectives or opinions*)) or attitude towards vaccines or opinions on vaccines or perspectives on vaccines).mp. [mp=title, abstract, original title, name of substance word, subject heading word, floating sub-heading word, keyword heading word, organism supplementary concept word, protocol supplementary concept word, rare disease supplementary concept word, unique identifier, synonyms] | 8973 |
| 5 | 3 and 4 | 463 |
| 6 | (coronavirus 2019 or COVID 19 or COVID-19 or coronavirus disease 2019 or 2019 novel coronavirus or 2019-novel CoV or COVID 2019 or 2019 ncov or COVID19 or nCoV-2019 or nCoV2019 or nCoV 2019 or COVID-19 or Severe acute respiratory syndrome coronavirus 2 or 2019-ncov or SARS-CoV-2 or novel novel coronavirus).mp. [mp=title, abstract, original title, name of substance word, subject heading word, floating sub-heading word, keyword heading word, organism supplementary concept word, protocol supplementary concept word, rare disease supplementary concept word, unique identifier, synonyms] | 139076 |
| 7 | 5 and 6 | 16 |

Database: African Index Medicus

Search date: July 5, 6:35 PM PST

| **Search Term** | **Search results** | **Notes** |
| --- | --- | --- |
| COVID-19 Vaccine Hesitancy | 0 |  |
| COVID-19 Vaccine Attitude | 0 |  |
| COVID-19 Vaccine Acceptance | 0 |  |
| COVID19 Vaccine Hesitancy | 0 |  |
| COVID19 Vaccine Attitude | 0 |  |
| COVID19 Vaccine Acceptance | 0 |  |

Database: African Journals Online

Search date: July 5, 8:10 PM PST

|  | **Search results** | **Notes** |
| --- | --- | --- |
| africa COVID-19 vaccine hesitancy | 8 | Unrelated - literature review, non-primary research, commentaries |
| Ghana COVID-19 vaccine hesitancy | 1 | Unrelated - literature review |
| Burkina COVID-19 vaccine hesitancy | 0 |  |
| Cameroon COVID-19 Vaccine hesitancy | 1 | Unrelated - non-primary research |
| Congo COVID-19 Vaccine hesitancy | 0 |  |
| Cote d'Ivoire COVID-19 vaccine hesitancy | 0 |  |
| Ethiopia COVID-19 Vaccine Hesitancy | 0 |  |
| Gabon COVID-19 Vaccine Hesitancy | 0 |  |
| Madagascar COVID-19 Vaccine Hesitancy | 1 | Unrelated - non-primary research |
| Mauritania COVID-19 vaccine hesitancy | 0 |  |
| Mauritus COVID-19 vaccine hesitancy | 0 |  |
| Sierra Leone COVID-19 vaccine hesitancy | 2 | unrelated - literature reviews |
| Somalia COVID-19 vaccine hesitancy | 0 |  |
| South Africa COVID-19 vaccine hesitancy | 2 | Unrelated - non-primary research |
| Zambia COVID-19 Vaccine hesitancy | 1 | Unrelated - review |
